# Supplementary material for: The Value of Trail Corridors for Bold Conservation Planning
Source: MDPI journal article supplement (doi:10.3390/land11030348), 2022-02-27
Supplement: s1 [file s1]

Table S1. Pacific Crest Trail and protected areas.

| Name                            | State | Acres     | Hectares  | Area<br>(sq km) | Percentage |
|---------------------------------|-------|-----------|-----------|-----------------|------------|
| Sequoia-Kings Canyon Wilderness | CA    | 768350.59 | 29,845.46 | 298.45          | 4.24%      |
| Yosemite National Park          | CA    | 745900.80 | 23,339.38 | 233.39          | 3.31%      |
| Yosemite Wilderness             | CA    | 704243.78 | 22,706.66 | 227.07          | 3.22%      |
| Kings Canyon National Park      | CA    | 458964.02 | 21,379.95 | 213.80          | 3.03%      |
| Alpine Lakes Wilderness         | WA    | 415578.08 | 17,813.63 | 178.14          | 2.53%      |
| John Muir Wilderness            | CA    | 653407.69 | 16,962.40 | 169.62          | 2.41%      |
| Glacier Peak Wilderness         | WA    | 566467.33 | 15,399.47 | 153.99          | 2.19%      |
| Three Sisters Wilderness        | OR    | 283769.65 | 13,661.26 | 136.61          | 1.94%      |
| Crater Lake National Park       | OR    | 182552.46 | 12,388.54 | 123.89          | 1.76%      |
| Sky Lakes Wilderness            | OR    | 113834.90 | 11,092.74 | 110.93          | 1.57%      |
| Mount Jefferson Wilderness      | OR    | 108963.60 | 9,272.84  | 92.73           | 1.32%      |
| Marble Mountain Wilderness      | CA    | 225300.80 | 9,209.61  | 92.10           | 1.31%      |
| Sequoia National Park           | CA    | 406805.66 | 8,466.06  | 84.66           | 1.20%      |
| Ansel Adams Wilderness          | CA    | 231020.99 | 8,409.84  | 84.10           | 1.19%      |
| Golden Trout Wilderness         | CA    | 305388.95 | 7,687.48  | 76.87           | 1.09%      |
| Goat Rocks Wilderness           | WA    | 108183.68 | 7,520.72  | 75.21           | 1.07%      |
| Diamond Peak Wilderness         | OR    | 52458.92  | 6,560.49  | 65.60           | 0.93%      |
| Henry M. Jackson Wilderness     | WA    | 103223.96 | 6,543.27  | 65.43           | 0.93%      |
| Mount Thielsen Wilderness       | OR    | 55150.65  | 6,442.74  | 64.43           | 0.91%      |
| Pasayten Wilderness             | WA    | 531274.19 | 6,396.14  | 63.96           | 0.91%      |
| Mark O. Hatfield Wilderness     | OR    | 65517.88  | 6,315.80  | 63.16           | 0.90%      |
| Owens Peak Wilderness           | CA    | 76969.74  | 6,094.96  | 60.95           | 0.87%      |
| San Jacinto Wilderness          | CA    | 33178.74  | 6,074.19  | 60.74           | 0.86%      |
| Desolation Wilderness           | CA    | 64054.74  | 5,497.62  | 54.98           | 0.78%      |
| William O. Douglas Wilderness   | WA    | 169201.66 | 5,495.62  | 54.96           | 0.78%      |
| South Sierra Wilderness         | CA    | 60319.19  | 5,415.78  | 54.16           | 0.77%      |
| Carson-Iceberg Wilderness       | CA    | 159344.30 | 5,253.54  | 52.54           | 0.75%      |
| Pleasant View Ridge Wilderness  | CA    | 26975.09  | 5,174.55  | 51.75           | 0.73%      |
| Lassen Volcanic National Park   | CA    | 107509.27 | 5,068.39  | 50.68           | 0.72%      |
| Stephen Mather Wilderness       | WA    | 641458.09 | 4,776.70  | 47.77           | 0.68%      |
| Trinity Alps Wilderness         | CA    | 540085.22 | 4,504.06  | 45.04           | 0.64%      |

|                                   |       |           |          |       |        |
|-----------------------------------|-------|-----------|----------|-------|--------|
| Mount Adams Wilderness            | WA    | 47123.27  | 4,401.73 | 44.02 | 0.62%  |
| San Geronio Wilderness            | CA    | 54706.77  | 4,384.77 | 43.85 | 0.62%  |
| North Cascades National Park      | WA    | 501379.64 | 4,324.54 | 43.25 | 0.61%  |
| Mount Hood Wilderness             | OR    | 64741.21  | 4,223.19 | 42.23 | 0.60%  |
| Kiavah Wilderness                 | CA    | 45245.25  | 4,097.81 | 40.98 | 0.58%  |
| Bucks Lake Wilderness             | CA    | 23776.48  | 4,066.19 | 40.66 | 0.58%  |
| Lassen Volcanic Wilderness        | CA    | 78566.88  | 3,694.19 | 36.94 | 0.52%  |
| Norse Peak Wilderness             | WA    | 52297.33  | 3,554.98 | 35.55 | 0.50%  |
| Mount Washington Wilderness       | OR    | 54451.86  | 3,490.77 | 34.91 | 0.50%  |
| Indian Heaven Wilderness          | WA    | 20783.52  | 3,343.66 | 33.44 | 0.47%  |
| Mokelumne Wilderness              | CA    | 104380.22 | 3,339.33 | 33.39 | 0.47%  |
| Hoover Wilderness                 | CA    | 128173.17 | 2,704.64 | 27.05 | 0.38%  |
| Castle Crags Wilderness           | CA    | 11079.38  | 2,431.50 | 24.32 | 0.35%  |
| Sheep Mountain Wilderness         | CA    | 43334.15  | 2,205.56 | 22.06 | 0.31%  |
| Granite Chief Wilderness          | CA    | 25260.46  | 1,954.89 | 19.55 | 0.28%  |
| San Geronio Wilderness            | CA    | 58636.44  | 1,951.19 | 19.51 | 0.28%  |
| Russian Wilderness                | CA    | 12653.13  | 1,926.37 | 19.26 | 0.27%  |
| Domeland Wilderness               | CA    | 94412.51  | 1,917.76 | 19.18 | 0.27%  |
| Soda Mountain Wilderness          | OR    | 24725.44  | 1,622.16 | 16.22 | 0.23%  |
| Mount Rainier National Park       | WA    | 236437.40 | 1,580.50 | 15.80 | 0.22%  |
| Mount Rainier Wilderness          | WA    | 227088.21 | 1,454.42 | 14.54 | 0.21%  |
| Domeland Wilderness               | CA    | 40115.43  | 1,452.78 | 14.53 | 0.21%  |
| Emigrant Wilderness               | CA    | 112844.64 | 1,110.98 | 11.11 | 0.16%  |
| Chimney Peak Wilderness           | CA    | 13243.39  | 803.44   | 8.03  | 0.11%  |
| San Gabriel Wilderness            | CA    | 35738.18  | 678.28   | 6.78  | 0.10%  |
| Kiavah Wilderness                 | CA    | 42609.13  | 602.73   | 6.03  | 0.09%  |
| Sawtooth Mountains Wilderness     | CA    | 33654.13  | 278.83   | 2.79  | 0.04%  |
| Red Buttes Wilderness             | CA-OR | 20175.27  | 183.62   | 1.84  | 0.03%  |
| Salmon-Huckleberry Wilderness     | OR    | 62135.89  | 136.47   | 1.36  | 0.02%  |
| Hauser Wilderness                 | CA    | 7197.27   | 113.21   | 1.13  | 0.02%  |
| Magic Mountain Wilderness         | CA    | 12241.37  | 88.01    | 0.88  | 0.01%  |
| Beauty Mountain Wilderness        | CA    | 15709.88  | 12.61    | 0.13  | 0.00%  |
| Owens River Headwaters Wilderness | CA    | 14725.22  | 4.27     | 0.04  | 0.00%  |
| Bright Star Wilderness            | CA    | 8763.28   | 0.37     | 0.00  | 0.00%  |
|                                   |       |           |          |       | 55.20% |

Hectares, acreage, and square km represents the total area that the proposed buffer currently crosses Gap status 1 and 2 lands.

Table S2. Continental Divide Trail and protected areas

| Name                         | State | Acres        | Hectares  | Area<br>(Sq km) | Percentage |
|------------------------------|-------|--------------|-----------|-----------------|------------|
| Glacier National Park        | MT    | 1,008,097.37 | 35,473.31 | 354.73          | 4.21%      |
| Bob Marshall Wilderness      | MT    | 1,014,477.05 | 23,137.09 | 231.37          | 2.75%      |
| Bridger Wilderness           | WY    | 426,751.45   | 21,346.46 | 213.46          | 2.53%      |
| Yellowstone National Park    | WY    | 2,199,453.66 | 21,224.34 | 212.24          | 2.52%      |
| Weminuche Wilderness         | CO    | 500,270.73   | 20,764.12 | 207.64          | 2.46%      |
| Anaconda Pintler Wilderness  | MT    | 158,753.49   | 13,129.24 | 131.29          | 1.56%      |
| Teton Wilderness             | WY    | 584,785.95   | 11,735.50 | 117.36          | 1.39%      |
| Scapegoat Wilderness         | MT    | 243,283.97   | 10,313.77 | 103.14          | 1.22%      |
| Rocky Mountain National Park | CO    | 267,038.86   | 9,108.66  | 91.09           | 1.08%      |
| South San Juan Wilderness    | CO    | 160,955.09   | 9,082.22  | 90.82           | 1.08%      |
| Rocky Mountain Wilderness    | CO    | 249,268.31   | 8,593.90  | 85.94           | 1.02%      |
| Aldo Leopold Wilderness      | NM    | 203,533.97   | 7,260.60  | 72.61           | 0.86%      |
| Mount Zirkel Wilderness      | CO    | 160,504.09   | 6,719.58  | 67.20           | 0.80%      |
| La Garita Wilderness         | CO    | 126,486.49   | 5,725.88  | 57.26           | 0.68%      |
| Collegiate Peaks Wilderness  | CO    | 166,224.02   | 4,130.02  | 41.30           | 0.49%      |
| Huston Park Wilderness       | WY    | 30,974.61    | 3,416.90  | 34.17           | 0.41%      |
| Indian Peaks Wilderness      | CO    | 75,219.91    | 3,207.95  | 32.08           | 0.38%      |
| San Pedro Parks Wilderness   | NM    | 41,305.19    | 3,195.75  | 31.96           | 0.38%      |
| Gila Wilderness              | NM    | 559,314.75   | 3,165.58  | 31.66           | 0.38%      |

|                               |    |            |          |       |        |
|-------------------------------|----|------------|----------|-------|--------|
| James Peak Wilderness         | CO | 17,080.37  | 2,668.20 | 26.68 | 0.32%  |
| Chama River Canyon Wilderness | NM | 46,052.56  | 2,428.04 | 24.28 | 0.29%  |
| West Malpais Wilderness       | NM | 39,951.65  | 2,149.02 | 21.49 | 0.26%  |
| Never Summer Wilderness       | CO | 20,830.49  | 1,994.71 | 19.95 | 0.24%  |
| Mount Massive Wilderness      | CO | 23,936.43  | 1,978.66 | 19.79 | 0.23%  |
| Holy Cross Wilderness         | CO | 122,939.31 | 1,223.91 | 12.24 | 0.15%  |
| Vasquez Peak Wilderness       | CO | 13,000.32  | 1,009.83 | 10.10 | 0.12%  |
| Cruces Basin Wilderness       | NM | 18,876.03  | 704.81   | 7.05  | 0.08%  |
| Mount Massive Wilderness      | CO | 2,553.38   | 347.76   | 3.48  | 0.04%  |
| Eagles Nest Wilderness        | CO | 135,218.29 | 29.79    | 0.30  | 0.00%  |
| Indian Peaks Wilderness       | CO | 2,911.68   | 5.59     | 0.06  | 0.00%  |
|                               |    |            |          |       | 27.93% |

Hectares, acreage, and square km represents the total area that the proposed buffer currently crosses Gap status 1 and 2 lands.

Table S3. Largest GAP Status 3 land units along the Pacific Crest Trail and Continental Divide Trails corridors.

| The Pacific Crest Trail         | GAP Status 3 (Sqkm) |
|---------------------------------|---------------------|
| San Bernardino National Forest  | 251.85              |
| Angeles National Forest         | 210.83              |
| Lassen National Forest          | 204.52              |
| Shasta-Trinity National Forest  | 121.00              |
| Tahoe National Forest           | 104.00              |
| Gifford Pinchot National Forest | 101.02              |
| Klamath National Forest         | 100.85              |
| Mt. Hood National Forest        | 99.92               |
| Plumas National Forest          | 92.56               |

---

|                                    |       |
|------------------------------------|-------|
| Okanogan-Wenatchee National Forest | 77.52 |
|------------------------------------|-------|

---

|                              |  |
|------------------------------|--|
| The Continental Divide Trail |  |
|------------------------------|--|

---

|                                              |        |
|----------------------------------------------|--------|
| Gila National Forest                         | 433.40 |
| Beaverhead-Deerlodge National Forest         | 264.28 |
| Carson National Forest                       | 245.06 |
| Medicine Bow-Routt National Forest           | 169.99 |
| National Public Lands - Rawlins Field Office | 168.83 |
| West Big Hole Roadless Area                  | 168.12 |
| National Public Lands                        | 167.99 |
| Helena-Lewis and Clark National Forest       | 140.00 |
| Italian Peak Roadless Area                   | 136.84 |
| White River National Forest                  | 126.68 |
| Cibola National Forest                       | 118.07 |

---
